1 Title: Enteric viruses isolates and rotavirus genotypes during the seasonal surge of acute watery  
2 childhood diarrhoea in South-Eastern Nigeria

3 Short title: Viruses isolated from childhood diarrhoea in Nigeria  
4

5

6 Akinwale Michale Efunshile\*<sup>1,2</sup>, Chukwuemeka Nwangwu.<sup>1</sup>, Bethrand Amechi Ngwu.<sup>1</sup>

7

8 <sup>1</sup> Department of Medical Microbiology, Ebonyi State University, Abakaliki, Nigeria

9 <sup>2</sup> Department of Medical Microbiology, Federal Teaching Hospital, Abakaliki, Nigeria

10 \* Address for correspondence: AME [akinwale.dr.efunshile@daad-alumni.de](mailto:akinwale.dr.efunshile@daad-alumni.de)

11

12

13

14

15

16 **Abstract**

17 Diarrhoea remains one of the top three causes of death in Africa. However, data on the  
18 molecular epidemiology of enteric viruses in Nigeria is rare.

19 Two hundred and forty three infants and children below the age of 5 years with acute watery  
20 diarrhoea were evaluated for the presence of enteric viruses in stool by real-time PCR  
21 (rtPCR) during the dry months of December to April 2017, which correspond to diarrhoea  
22 season in South-East Nigeria. At least one viral pathogen was detected in 95.1% (231/243) of  
23 the study population. Rotavirus, 231(95.1%) was the most common followed by adenovirus,  
24 103(42.4%) and enterovirus 32(13.2%). Other viruses seen in the stool samples include  
25 astrovirus 7.3 % (11/151), parechovirus 3.5 % (4/113), sapovirus, 2.8 % (4/145), bocavirus  
26 6.8% (5/73) and human coronavirus 13.9% (10/73). Norovirus and hepatitis A and E viruses  
27 were not detected. Children that consumed factory packaged water had the lowest prevalence  
28 of rotavirus infection ( $p=0.044$ ). A significant association between the viral pathogen and  
29 home treatment of drinking water or exclusive breastfeeding was not observed. Randomly  
30 selected 46 samples were genotyped for rotavirus, which showed that G3P[6] (39.1%) was  
31 the most common, followed by G1P[8] (15.2%), G9P[8] (13.0%), G12P[8] (6.5%),  
32 G9P[6]P[8] (2.2%), and G12P[6] (2.2%).

33 This was the highest rotavirus prevalence in any published African study, and may be a  
34 reflection of inadequate water sanitation/hygiene in the study area, a peculiar epidemiological  
35 situation and/or the sensitivity of the diagnostic method used.

36 The present study suggests that the burden of rotavirus is bigger than previously reported; and  
37 that morbidity can be greatly reduced if rotavirus vaccine is included in Nigerian national  
38 immunization policy.

39

40 **Keywords:** Acute diarrhoea, Enteric viruses, Rotavirus, Rotavirus genotypes.

## 41 **Introduction**

42

43 Diarrhoea caused an estimate of 1.3 million deaths globally in 2015 and it was reported to be  
44 the 4<sup>th</sup> leading cause of death among children less than 5 years old [1].

45 Diarrhoea was reported to have killed more than 500,000 children under 5 years in 2015  
46 alone, with Asia and Sub-Saharan Africa recording the highest number of incidence and  
47 deaths [2]. Although, deaths from diarrhoea and other diseases declined globally between  
48 2010 and 2015, the reduction rate was not remarkable in Nigeria and many other Sub-Sahara  
49 Africa countries as a result of inadequate water, poor sanitation and hygiene; as well as  
50 predisposition from malnutrition [2]. Rotavirus, cryptosporidium and shigella *spp* were the  
51 major agents which accounted for more than 50% of diarrhoea deaths among children below  
52 the age of 5 years in 2015 [1]. In its comprehensive assessment, the Global Burden of  
53 Diseases in 2015 also listed enteric adenovirus and noroviruses as other viral agents that  
54 significantly contributed to diarrhoea deaths [1]. Though, the burden of specific viral agent  
55 depends on the study region and the season. Because rotavirus is the commonest diarrhoea  
56 agent worldwide, the incidence and mortality of its associated diarrhoea were shown to have  
57 significantly declined in countries where rotavirus vaccines were introduced [3]. The WHO  
58 therefore recommends that rotavirus vaccine is included in routine immunization policy,  
59 especially in developing countries [4]. Rotavirus gastroenteritis is more seasonal in temperate  
60 regions compared to the tropical areas where it occurs more or less all the year round. And  
61 this difference was found to be associated with socio-economic factors rather than being an  
62 effect of climate [5]. A systematic review of rotavirus diarrhoea in several African countries  
63 concluded that the disease usually peak during the dry period of the year in most countries  
64 [6]. In Asia, where diarrhoea burden is similar to what obtains in Africa, findings also  
65 showed that diarrhoea occurs all the year round, and that 45% of diarrhoea in children below

66 the age of 5 years was attributed to rotavirus [7]. Co-infection between rotavirus and other  
67 viral diarrhoea agents have also been reported. For instance, rotavirus (26.6%) was found to  
68 be more common among Moroccan diarrhoea children, while mixed infection with norovirus  
69 was found in 2.7% of the cases [8]. Another diarrhoea study reported rotavirus and norovirus  
70 in a cohort of 50 diarrheic South-West Nigerian children with a prevalence of 34.5% and  
71 25.5% respectively, while co-infection with both viruses was seen in 9.1% of cases [9]. Three  
72 enteric viruses, rotavirus (28.3%), Adenovirus (19.3%), and norovirus (3.6%) were also  
73 reported among diarrhoea children in South-South region of Nigeria with co-infections by 2  
74 or 3 viruses in 7.6% cases [10]. A recent report evaluating diarrhoea agents over a 12 months  
75 period in Nigeria showed that at least one was identified in 58.3% of cases with co-infections  
76 involving norovirus or astrovirus or aichivirus in some cases [11].

77 Countries with the highest rotavirus burden including Nigeria are yet to implement the WHO  
78 vaccine policy despite its proven efficacy [4,12]. Changes in the aetiology and epidemiology  
79 of viral agents of diarrhoea were reported following the introduction of rotavirus vaccines  
80 [13, 14]. This underlines the importance of continuous surveillance of enteric viral agents to  
81 enable effective planning for future control efforts. Such surveillance will also help to bring  
82 the public health impact and effectiveness of the vaccines to the forefront, thereby  
83 encouraging policy implementation in countries that are yet to comply. The present study  
84 aimed at evaluating enteric viral agents associated with acute diarrhoea in the study area and  
85 to provide baseline epidemiologic data ahead of the national rotavirus vaccine  
86 implementation. Additionally, the relationship between feeding practices and sources of  
87 drinking water and enteric viruses was evaluated.

88  
89  
90

## 91 **Methods**

### 92 **Study design**

93 This is a cross sectional study primarily designed to identify the viral agents of acute  
94 diarrhoea in infants and children below 5 years of age. Inclusion criteria were passage of  
95 watery stool three or more times within the last 24 hours, age of 5 years or less and  
96 willingness to participate in the study. The Ethical Committee of the Federal Teaching  
97 Hospital Abakaliki, Nigeria, approved the study. Written informed consent were obtained  
98 from the parents/guardian of the children after the purpose of the study were translated to  
99 them in local dialects.

### 100 **Study Area**

101 The study was carried out at University Teaching Hospitals (Ebonyi and Enugu) in the South-  
102 Eastern Region of Nigeria between latitudes 04<sup>0</sup>30'N and 07<sup>0</sup>30'N and longitudes 06<sup>0</sup>45'E  
103 and 08<sup>0</sup>45'E [15], during the peak diarrhoea period, in the months of December 2016 to April  
104 2017.

### 105 **Data collection and management**

106 Questionnaires were administered to the parents/guardian of the participants to collect data  
107 regarding age, frequency and duration of diarrhoea, risk factors and other relevant  
108 information. This information were subsequently transferred into excel sheets for analysis.

### 109 **Specimen management and preliminary examination**

110 About 5 ml of watery stool were collected from the participants into wide mouth bottles.  
111 Inactivated aliquots were shipped to the Institute of Virology, Leipzig University, Germany.

112

### 113 **Virus PCR**

114 Total nucleic acids was extracted from 10 % stool suspensions in PBS by MagNA Pure 96  
115 system (Roche Applied Science, Mannheim, Germany), aliquoted, and stored at -80°C.

116 Aliquots were subsequently screened by real-time (RT)-PCRs for presence of viral genome of  
117 species A rotavirus, norovirus (genogroup I and II), sapovirus (genogroup I, II, IV and V),  
118 adenovirus (group A to F), parechovirus, astrovirus (HastV 1–8), and hepatitis E virus and  
119 coronavirus [16-24]. Primers and probes used for detection of enterovirus (EV) species A to  
120 D (including coxsackieviruses, echoviruses, enterovirus and poliovirus), human bocavirus and  
121 hepatitis A virus (HAV) targeted the 5’NTR-regions of the viral genome: EV-1s (5’-  
122 GGTGCGAAGAGTCT ATTGAGCTA-3’), EV-1as (5’-ACCCAAAGTAGTCGGTTCC-3’),  
123 EV-probe (5’-6FAM-TGAATGCGGCTAATCCTAACTGCG-DB-3’), hBoV\_5UTR\_Q\_s1  
124 (5’-CCTATATAARCCGATGCACT), hBoV\_5UTR\_Q\_s2 (5’-  
125 CCTATATAAGCTGCTGCACT), hBOV\_NS1\_Q\_as1 (5’-  
126 AGGAGCAGAAAAGGCCATA), hBoV\_NS1\_Q\_as2 (5’-AGGRGGATTGAAAGCCATA),  
127 hBoV\_Q-TaqFAM (5’-6FAM-TCCGGCGAGTGAACATCTCT—BBQ), HAV-5UTR-Qs  
128 (5’AATATTAATTCCTGCAG GTTCAG-3’), HAV-5UTR-Qas  
129 (5’AGCCAAGTTAACTGCAAG-3’), and HAV-5UTR QFAM (5’6FAM-  
130 CAATTTAGACTCCTACAGCTCCATGCTA-BBQ-3’).

### 131 **Rotavirus G and P typing**

132 Randomly selected 46 samples tested by quantitative real time PCR for rotavirus were  
133 sequenced as previously described using published methodology [25,26]. The G and P type-  
134 specific amplification of VP7 and VP4 fragments was performed using QIAgen One-step RT-  
135 PCR kit (QIAgen, Hilden, Germany). For the first run, primers used were VP7-F and VP7-R  
136 for the VP7 gene while VP4-F and VP4-R were used for the VP4 gene. A second semi-nested  
137 multiplex PCR was done using G1-, G2-, G3-, G4-, G8-,G9-, G10- and G12-specific sense  
138 primers for G types, while P-typing included P[4]-, P[6]-, P[8]-, P[9]-, P[10]-, and P[11]-  
139 specific antisense primers together with VP7-R and VP4-F, respectively.

140 Gel purified amplicons (Wizard SV Gel and PCR Clean-Up System; Promega, Mannheim,  
141 Germany) were partially sequenced (approximately 600 bp each) using BigDye Terminator  
142 v1.1 Cycle Sequencing kit (PE Applied Biosystems, Foster City, CA) on an ABI Prism 310  
143 Genetic Analyzer. Nucleotide sequences read from the chromatograms were aligned.  
144 Sequencing of the r amplicons was done for the 46 randomly selected rotavirus isolates.

#### 145 **Statistical analysis**

146 Data were analysed with the freely available GNU PSPP Statistical Analysis Software  
147 version 1.0.1-g818227 [27]. Descriptive statistics was used to compare the various variables,  
148 while Chi-square tests were used to derive significant associations which was set at p-value  
149 <0.05.

150

#### 151 **Results**

152 For the present investigations, stool samples obtained from 243 children were available. Most  
153 of the children, 71.2% (173/243) were below the age of 2 years, and 65% (158/243) were  
154 males (table 1).

155

156 **Table 1. Age and sex distribution of participants**

|           | Gender (N (%)) |           | Total     |
|-----------|----------------|-----------|-----------|
|           | Male           | Female    |           |
| Age group |                |           |           |
| <2        | 111 (64.2)     | 62 (35.8) | 173 (100) |
| 2-3       | 40 (64.5)      | 22 (35.5) | 62 (100)  |
| >3        | 7 (87.5)       | 1 (12.5)  | 8 (100)   |
| Total     | 158 (65.2)     | 85 (34.8) | 243 (100) |

157

158

159 Eleven enteric viruses were tested. Not all samples were tested for each of the viruses (table  
160 2). Ninety-four (38.7%) of the adenovirus positive cases were also co-infected with *Rotavirus*  
161 while triple infection between rotavirus, adenovirus and enterovirus was observed in 7.0% of  
162 the cases (table 2).

163

164 **Table 2. Enteric virus distribution in the study population**

| Enteric viruses                        | Number of samples tested | Prevalence, N (%) |
|----------------------------------------|--------------------------|-------------------|
| Rotavirus                              | 243                      | 231 (95.1)        |
| Adenovirus                             | 243                      | 103 (42.4)        |
| Enterovirus                            | 243                      | 32(13.2)          |
| Astrovirus                             | 151                      | 11(7.3)           |
| Sapovirus                              | 150                      | 3(2.0)            |
| Norovirus                              | 145                      | 0(0.0)            |
| Parechovirus                           | 113                      | 4 (3.5)           |
| Bocavirus                              | 73                       | 5(6.8)            |
| Human Coronavirus                      | 73                       | 10(13.7)          |
| Hepatitis A virus                      | 51                       | 0(0)              |
| Hepatitis E virus                      | 51                       | 0(0)              |
| Rotavirus +Adenovirus                  | 243                      | 94(38.7)          |
| Rotavirus +Enterovirus                 | 243                      | 30(12.3)          |
| Rotavirus +Astrovirus <sup>#</sup>     | 151                      | 7(4.6)            |
| Adenovirus + Enterovirus               | 243                      | 24(9.9)           |
| Rotavirus +Adenovirus +<br>Enterovirus | 243                      | 17(7.0)           |
| Enterovirus +Sapovirus <sup>#</sup>    | 150                      | 1(0.7)            |
| Parechovirus <sup>#</sup> +Adenovirus  | 113                      | 1(0.9)            |

165 N; number of positives <sup>#</sup> See discussion

166



167 There was no significant association between ages or sex and any of the 3 most commonly  
168 encountered enteric viruses (table 3).

169

170 **Table 3. Age and sex distribution of Rotavirus, Adenovirus and Enterovirus among**  
171 **diarrheic children below the age of 5 years**

|                    | Rotavirus , N (%) |          | Adenovirus, N (%) |            | Enterovirus, N (%) |            |
|--------------------|-------------------|----------|-------------------|------------|--------------------|------------|
|                    | Positive          | Negative | Positive          | Negative   | Positive           | Negative   |
| <b>Age (years)</b> |                   |          |                   |            |                    |            |
| <1                 | 140 (99.2)        | 1 (0.8)  | 76 (53.1)         | 65 (46.9)  | 25 (19.4)          | 116 (17.7) |
| 1-2                | 50 (84.7)         | 9 (15.3) | 22 (37.3)         | 37 (62.7)  | 4 (6.8)            | 55 (93.2)  |
| 2-5                | 41 (95.3)         | 2 (4.7)  | 5 (11.6)          | 38 (88.4)  | 3 (7.0)            | 40 (93.0)  |
| Total              | 231 (95.1)        | 12(4.9)  | 103(42.4)         | 140 (57.6) | 32 (13.2)          | 211 (86.8) |
| P-value            | 0.676             |          | 0.164             |            | 0.824              |            |
| <b>Sex</b>         |                   |          |                   |            |                    |            |
| Male               | 150 (94.9)        | 8 (5.1)  | 71 (44.9)         | 87 (55.1)  | 23 (14.6)          | 135 (85.4) |
| Female             | 81 (95.3)         | 4 (4.7)  | 32 (37.6)         | 53 (62.4)  | 9 (10.6)           | 76 (89.4)  |
| Total              | 231 (95.1)        | 12 (4.9) | 103(42.4)         | 140 (57.6) | 32 (13.2)          | 211 (86.8) |
| P-value            | 0.378             |          | 0.243             |            | 0.210              |            |

172

173 The present study did not establish a significant association between the three common  
174 enteric viruses (i.e. rotavirus, enterovirus and adenovirus) and past history of exclusive  
175 breastfeeding or the current feeding practice of the children (table 4).

176 **Table 4. Rotavirus, adenovirus and enterovirus prevalence in relation to feeding**  
177 **practices in diarrheic children below the age of 5 years**

|                        | Rotavirus  |             | Adenovirus |            | Enterovirus |            |
|------------------------|------------|-------------|------------|------------|-------------|------------|
|                        | Pos, N (%) | Neg , N (%) | Pos, N (%) | Neg, N (%) | Pos, N (%)  | Neg, N (%) |
| <b>EBF history</b>     |            |             |            |            |             |            |
| Yes                    | 102 (95.3) | 5 (4.7)     | 47 (43.9)  | 60 (56.1)  | 37 (34.6)   | 70 (65.4)  |
| No                     | 129 (95.6) | 6 (4.4)     | 61 (45.2)  | 74 (54.8)  | 24 (17.8)   | 111 (82.2) |
| Total                  | 231(95.1)  | 12(4.9)     | 103(42.4)  | 140 (57.6) | 32 (13.2)   | 211 (86.8) |
| P-value                | 0.378      |             | 0.055      |            | 0.496       |            |
| <b>Current Feeding</b> |            |             |            |            |             |            |
| EBF                    | 16 (100)   | 0(0)        | 7 (43.8)   | 9 (65.2)   | 2 (12.5)    | 14 (87.5)  |
| Complimentary          | 195 (95.1) | 10 (4.9)    | 87 (44.5)  | 118 (57.6) | 28 (13.7)   | 177 (86.3) |
| PBF                    | 19 (95)    | 1 (5)       | 8 (40.0)   | 12 (60.0)  | 1 (5.0)     | 19 (95.0)  |
| Supplementary          | 1 (50)     | 1 (50)      | 1 (50.0)   | 1 (50.0)   | 1 (50.0)    | 1 (50.0)   |

|         |           |         |           |            |           |            |
|---------|-----------|---------|-----------|------------|-----------|------------|
| Total   | 231(95.1) | 12(4.9) | 103(42.4) | 140 (57.6) | 32 (13.2) | 211 (86.8) |
| P-value | 0.85      |         | 0.981     |            | 0.153     |            |

178

179 Key-Pos= Positive, Neg= Negative, EBF= Exclusive breastfeeding, PBF = Predominant  
180 breastfeeding

181

182

183

184 But there was a significant association between the sources of drinking water and prevalence  
185 of rotavirus infection (P=0.044), as children that consumed factory packaged water had the  
186 lowest prevalence of rotavirus infection. But this association was not significant for  
187 adenovirus and enterovirus (table 5). Approximately half of the children consumed factory  
188 packaged water from plastic bottles. An association between home treatments of drinking  
189 water with any of the viruses was not observed, though the majority of children consumed  
190 water without any form of home treatment (table 5).

191

192 **Table 5. Rotavirus, adenovirus and enterovirus relationship with sources of drinking**  
193 **water and treatment practices among children below the age of 5 years**

|                                 | Rotavirus  |            | Adenovirus |            | Enterovirus |            |
|---------------------------------|------------|------------|------------|------------|-------------|------------|
|                                 | Pos, N (%) | Neg, N (%) | Pos, N (%) | Neg, N (%) | Pos, N (%)  | Neg, N (%) |
| <b>Source of drinking water</b> |            |            |            |            |             |            |
| Cart vendor                     | 66 (100)   | 0 (0)      | 30 (45.5)  | 36 (55.5)  | 8 (14.0)    | 49 (86.0)  |
| Borehole                        | 13 (92.9)  | 1 (7.1)    | 8 (57.1)   | 6 (42.9)   | 6 (42.9)    | 8 (57.1)   |
| Dug well                        | 4 (100)    | 0 (0)      | 1 (15.0)   | 3 (75.0)   | 2 (50.0)    | 2 (50.0)   |
| Bottled water                   | 116 (96.7) | 4 (3.3)    | 57 (43.2)  | 75 (56.8)  | 16 (13.5)   | 102 (86.5) |
| Total#                          | 199 (97.5) | 5 (2.5)    | 96(44.4)   | 120 (55.6) | 32(16.6)    | 161(83.4)  |

|                             |            |         |           |            |           |            |
|-----------------------------|------------|---------|-----------|------------|-----------|------------|
| P-value                     | 0.044*     |         | 0.691     |            | 0.097     |            |
| <b>Home water treatment</b> |            |         |           |            |           |            |
| None                        | 165 (97.1) | 5 (2.9) | 75 (41.2) | 107 (58.8) | 30 (18.6) | 130 (81.4) |
| Boiling                     | 30 (100)   | 0 (0)   | 17 (56.7) | 13 (43.3)  | 2 (6.7)   | 28 (93.3)  |
| Filtration                  | 1 (100)    | 0 (0)   | 1 (100.0) | 0 (0)      | 0 (0)     | 1 (100)    |
| Chemical (Chlorination)     | 3 (100)    | 0 (0)   | 3 (100.0) | 0 (0)      | 0 (0)     | 2 (100)    |
| Total                       | 199 (97.5) | 5 (2.5) | 96(44.4)  | 120 (55.6) | 32 (16.6) | 161 (83.4) |
| P-value                     | 0.338      |         | 0.051     |            | 0.155     |            |

194 Key-Pos= Positive, Neg= Negative, \*= Significant value, # Not all children drink water  
195 because of exclusive breastfeeding  
196

197 There was no significant difference between rotavirus infections in the children across the  
198 two cities that were studied. Adenovirus was significantly more common among the children  
199 from Enugu (P=0.001), (table 6).

200

201 **Table 6. Rotavirus, adenovirus and enterovirus distribution across the study areas**

| Study sites | Rotavirus, N (%) |         | Adenovirus, N (%) |           | Enterovirus, N (%) |            |
|-------------|------------------|---------|-------------------|-----------|--------------------|------------|
|             | Pos              | Neg     | Pos               | Neg       | Pos                | Neg        |
| Enugu       | 161 (95.3)       | 8 (4.7) | 86 (50.8)         | 83 (49.2) | 31 (18.3)          | 138 (81.7) |
| Abakaliki   | 70 (94.5)        | 4 (5.5) | 17 (22.9)         | 57 (77.1) | 1 (1.4)            | 73 (98.6)  |
| Total       | 231(95.1)        | 12(4.9) | 103(42.4)         | 140(57.6) | 32 (13.2)          | 211 (86.8) |
| P-value     | 0.418            |         | 0.001*            |           | 0.048*             |            |

202 Key-Pos= Positive, Neg= Negative, \*= Significant value

203

204 The genotypes of the 46 randomly selected rotavirus isolates were described in the table 7.

205 Genotype G3P[6] was the predominant genotype, 18(39.1) followed by G1P[8], 7(15.2).

206

207

208

209 **Table 7 : Distribution of G and P genotype combination of RVA strains detected among**  
210 **gastroenteritis children below 5years old**

| Rotavirus genotype |                    |          |           |       |          |
|--------------------|--------------------|----------|-----------|-------|----------|
|                    | No. (%) of strains |          |           |       |          |
|                    | P[6]               | P[8]     | P[6]/P[8] | P n/t | Total    |
| G1                 | 0                  | 7(15.2)  | 0         | 0     | 7(15.2)  |
| G3                 | 18(39.1)           | 0        | 0         | 0     | 18(39.1) |
| G9                 | 0                  | 6(13.0)  | 1(2.2)    | 0     | 7(15.2)  |
| G12                | 1(2.2)             | 3(6.5)   | 2(4.3)    | 0     | 6(13.0)  |
| G1/G9 (mixed)      | 0                  | 0        | 1(2.2)    | 0     | 1(2.2)   |
| G3/G12 (mixed)     | 1(2.2)             | 0        | 2(4.3)    | 0     | 3(6.5)   |
| G9/G12 (mixed)     | 0                  | 1(2.2)   | 1(2.2)    | 0     | 2(4.3)   |
| G n/t              | 2(4.3)             | 0        | 0         | 0     | 2(4.3)   |
| Total              | 22(47.8)           | 17(14.0) | 7(15.2)   | 0     | 46(100)  |

211 n/t= not typeable

212

213

## 214 Discussion

215 The prevalence of rotavirus observed in our study (95.1%) was far higher than the average  
216 report among African children, which is in the range of 25 to 40% [6]. It was also higher than  
217 the WHO rotavirus surveillance data which reported a mean prevalence of 32% among 37  
218 countries including Nigeria [28]. The High prevalence might be due to differences in water  
219 supply and hygiene practices between our study area and the other regions with lower  
220 prevalence. For instance, a recent review showed that packaged water in developing countries  
221 was 4.6-13.6 times more likely to contain bacteria indicator of faecal contamination  
222 compared to developed countries [29]. Sizable numbers of the children also drank from cart  
223 water vendors, while most of the water consumed was not subjected to any form of home  
224 treatment. Differences in the prevalence of rotavirus may also depend on the diagnostic  
225 method used and the season of the year when the study was conducted. It is likely that the  
226 present study would have reported a lower prevalence if ELISA had been used, because a

227 study by the research group of Adah reported a rotavirus prevalence of 11.8% and 88.2%  
228 from the same stool samples, when ELISA and RT-PCR methods were used respectively  
229 [30]. Similar studies from our study area reported a lower rotavirus prevalence of 46% and  
230 56% in 2 separate studies carried out over a period of 5 and 2 years respectively using ELISA  
231 test methods [31, 33]. But another Nigerian study that used RT-PCR also reported lower  
232 rotavirus prevalence of 48%. This might be related to the differences in the study regions and  
233 study period [33].

234 Lack of significant association between enteric viruses and exclusive breastfeeding in the  
235 present study seems unpredictable. This is possibly because we did not evaluate non-  
236 diarrhoeic children as negative controls, which of course is beyond the scope of our study.  
237 But there are studies which seem to agree with our findings, for instance, the research group  
238 of Clemens showed that breastfeeding does not reduce incidence of diarrhoea, it only reduces  
239 the severity [34]. Golding *et al* also concluded in their research that breastfeeding only  
240 protect against diarrhoea of non-viral aetiologies [35].

241 The 42.4% prevalence of Adenovirus in our study was higher than the result from a study  
242 from North-Western Nigeria [36] which was 22.3%. The difference may also be because we  
243 used RT-PCR technique in our study which is more sensitive than the rapid kits used by the  
244 other study. Unlike our findings, another study from Nigeria reported higher prevalence of  
245 astrovirus (40.4%) [37], and this might be due to regional differences in viral diarrhoea  
246 agents. Absence of norovirus in our study was contrary to findings from other African  
247 studies. Norovirus prevalence of 25.5% was once reported in South-western region of Nigeria  
248 [9] while a review of 19 studies from Sub-Sahara Africa showed that the prevalence ranged  
249 from 4.6% to 32.4% [38]. The season of our study was probably responsible. There is a need  
250 to further investigate the epidemiology of this virus in South-East Nigeria in a larger cohort  
251 of diarrheic children, with specimen collection throughout the year. Studies relating to

252 sapovirus are very rare in Nigeria. A similar study in 2 areas in Kenya also reported low  
253 prevalence of 4% and 6% at both areas [39]. This supports the impression that this enteric  
254 virus played less significant role in our current study. Like sapovirus, this is the first report of  
255 parechovirus study in Nigeria. Two of the three samples that were positive for this virus were  
256 negative for all other enteric viruses tested, and they also had the cycle threshold ( $C_T$ ) of the  
257 RT-PCR below 30 ( $C_t$  data not shown), suggesting significantly high viral load and  
258 probability of being responsible for the diarrhoea cases. But it had been reported that the  
259 types, rather than viral load of parechovirus is more important in clinical settings. Infections  
260 with type 3 HPeV is said to be clinically relevant when detected, regardless of the viral load  
261 [40]. Co-infection of 2 or 3 enteric viruses observed in our study was likely due to the fact  
262 that they share the same faecal-oral transmission pathway, as a result of inadequate water,  
263 sanitation and hygiene. The present result of co-infection with astrovirus, sapovirus and  
264 parechovirus also called for interpretation with caution since only a subset of the stool  
265 samples were tested for these particular viruses. Further studies will need to simultaneously  
266 test larger sample size to get a more accurate co-infection rate. The relatively lower  $C_T$  of  
267 *rotavirus* compared to other viruses is a reflection of its higher viral load [41], which may  
268 suggest its relative importance in the cases with co-infections.

269 From this study, genotype G3P[6] was the commonest genotype observed. This supports the  
270 earlier suggestion that the high prevalence of the RTV reported in this study could be largely  
271 due to ingestion of contaminated water since type G3 is known to be conserved in human  
272 without zoonotic transmission from animals.<sup>42</sup> Some authors have observed a significant  
273 correlation between G3 genotype and poor sanitation and infection control, and low rotavirus  
274 vaccine coverage [42-44]. Although most recent studies in Nigeria, reported other rotavirus G  
275 types as the most common. For instance in studies done by Japhet (2017) and Motayo (2018),  
276 the prevalent genotypes were G12 and G1 respectively [43, 44]. The two studies were done

277 throughout the year in the Western part of Nigeria. Apart from the differences in the study  
278 period, the study areas were different from ours with respect to social, cultural and  
279 economical determinants. These factors were known to determine the spread of rotavirus  
280 genotype [45], hence there is need for national surveillance and characterization of rotavirus  
281 in Nigeria for accurate data to better influence policy, monitoring and evaluation of  
282 interventions. In a six year (2011-2016) rotavirus surveillance study done at Enugu by Tagbo  
283 (2019), G3P [6] was the most common genotype reported in 2016, which is the part of the  
284 period our study was conducted [46]. This also affirms the yearly and seasonal variation of  
285 rotavirus strains as wildly reported [45]. In the same study by Tagbo, the cumulative  
286 prevalence of rotavirus genotypes throughout the six year study period was G12, G1 and G3  
287 accounting for 27.6%, 21.0% and 16.3% respectively [46]. Therefore rotavirus strains  
288 distribution and prevalence is determined by a lot of factors and study design.

289

## 290 **Conclusion**

291 The present study suggests that the burden of rotavirus in Nigeria was likely underestimated  
292 by previous studies that used non-molecular epidemiologic tool. It also underscores the need  
293 to properly investigate the accurate epidemiology of enteropathogenic viruses at a national  
294 level so that attention of policy makers and other healthcare stakeholders can urgently be  
295 drawn to the need for prompt implementation of rotavirus vaccine as part of the national  
296 immunization policy.

297

## 298 **Limitation of the study**

299

300 The study did not rule out all other possible cause of diarrhoea including bacteria and  
301 parasites among the study participants, so it was difficult to establish a causal relationship  
302 between the viruses and the diarrhoea.

303 **Competing interest**

304 The authors declared no conflict of interest

305 **Author's contributions**

306 EAM, NC conceived the project idea and developed the proposal. EAM, NC carried out  
307 sample and data collection, NC went to Germany to analyze the samples, EAM, NC, NBAF  
308 wrote the manuscript, EAM, BAF carried out the statistics analysis. All the authors edited  
309 and approved final version of the manuscript

310 **Acknowledgment**

311 We sincerely thank the Institute of Virology, Leipzig University, Germany for the technical  
312 assistance for the molecular diagnostics

313



## 314 **References**

- 315 1. Troeger C, Forouzanfar M, Rao PC, Khalil I, Brown A, Reiner Jr RC, Fullman N,  
316 Thompson RL, Abajobir A, Ahmed M, Alemayohu MA. Estimates of global,  
317 regional, and national morbidity, mortality, and aetiologies of diarrhoeal diseases: a  
318 systematic analysis for the Global Burden of Disease Study 2015. *Lancet Infect Dis.*  
319 2017;17(9):909-948.
- 320 2. Liu L, Oza S, Hogan D, Chu Y, Perin J, Zhu J, Lawn JE, Cousens S, Mathers C,  
321 Black RE. Global, regional, and national causes of under-5 mortality in 2000–15: an  
322 updated systematic analysis with implications for the Sustainable Development Goals.  
323 *Lancet.* 2016;388(10063):3027-3035.
- 324 3. Troeger C, Khalil IA, Rao PC, Cao S, Blacker BF, Ahmed T, Armah G, Bines JE,  
325 Brewer TG, Colombara DV, Kang G. Rotavirus vaccination and the global burden of  
326 rotavirus diarrhea among children younger than 5 years. *JAMA Pediatr*  
327 2018;172(10):958-965.
- 328 4. World Health Organization Rotavirus vaccines. WHO position paper – January 2013.  
329 *Wkly Epidemiol Rec.* 2013;88:49–64.
- 330 5. Patel MM, Pitzer V, Alonso WJ, Vera D, Lopman B, Tate J, Viboud C, Parashar UD.  
331 Global seasonality of rotavirus disease. *Pediatr Infect Dis J.* 2013; 32(4): e134.
- 332 6. Cunliffe NA, Kilgore PE, Bresee JS, Hart CA, Glass RI Epidemiology of rotavirus  
333 diarrhoea in Africa: a review to assess the need for rotavirus immunization. *Bull*  
334 *World Health Organ.* 1998; 76:525–537.
- 335 7. Bresee J, Fang ZY, Wang B, Nelson EA, Tam J, Soenarto Y, Wilopo SA, Kilgore P,  
336 Kim JS, Kang JO, Lan WS. First report from the Asian Rotavirus Surveillance  
337 Network. *Emerg Infect Dis.* 2004;10(6):988-995.

- 338 8. El Qazoui M, Oumzil H, Baassi L, El Omari N, Sadki K, Amzazi S, Benhafid M, El  
339 Aouad R. *Rotavirus* and *Norovirus* infections among acute gastroenteritis children in  
340 Morocco. *BMC Infect Dis*. 2014;14(1):1-9.
- 341 9. Japhet MO, Adesina OA, Famurewa O, Svensson L, Nordgren J. Molecular  
342 epidemiology of rotavirus and norovirus in Ile-Ife, Nigeria: High prevalence of  
343 G12P[8] rotavirus strains and detection of a rare *norovirus* genotype. *J Med Virol*.  
344 2012; 84(9):1489-1496.
- 345 10. Imade PE, Eghafona NO. Viral Agents of Diarrhea in Young Children in Two  
346 Primary Health Centers in Edo State, Nigeria. *Int J Microbiol*. 2015:685821.  
347 doi:10.1155/2015/685821.
- 348 11. Japhet MO, Famurewa O, Adesina OA, Opaleye OO, Wang B, Höhne M, Bock CT,  
349 Marques AM, Niendorf S. Viral gastroenteritis among children of 0-5 years in  
350 Nigeria: Characterization of the first Nigerian aichivirus, recombinant noroviruses and  
351 detection of a zoonotic astrovirus. *J Clin Virol*. 2019;111:4-11.
- 352 12. Yen C, Tate JE, Hyde TB, Cortese MM, Lopman BA, Jiang B, Parashar UD.  
353 Rotavirus vaccines: Current status and future considerations. *Hum Vaccin*  
354 *Immunother*. 2014;10(6):1436-1448.
- 355 13. Becker-Dreps S, Bucardo F, Vilchez S, Zambrana LE, Liu L, Weber DJ, Peña R,  
356 Barclay L, Vinjé J, Hudgens MG, Nordgren J, Lennart Svensson, Douglas R. Morgan,  
357 Félix Espinoza, Margarita Paniagua. Etiology of childhood diarrhea following  
358 rotavirus vaccine introduction: a prospective, population-based study in Nicaragua.  
359 *Pediatr Infect Dis J*. 2014;33(11):1156.
- 360 14. Chen CJ, Wu FT, Huang YC, Chang WC, Wu HS, Wu CY Lin JS, Huang FC, Hsiung  
361 CA. Clinical and Epidemiologic Features of Severe Viral Gastroenteritis in Children:

- 362 A 3-Year Surveillance, Multicentered Study in Taiwan with Partial Rotavirus  
363 Immunization. *Med*. 2015;*94*(33): e1372.
- 364 15. Igbokwe JI, Akinyede JO, Dang B, Alaga T, Ono MN, Nnodu VC, Anike LO.  
365 Mapping and monitoring of the impact of gully erosion in South eastern Nigeria with  
366 satellite remote sensing and Geographic Information System. *Intl Arch*  
367 *Photogrammetry, Remote Sensing and Spatial Information Sciences*. 2008;*37*:  
368 (B8):875-872
- 369 16. Freeman MM, Kerin T, Hull J, McCaustl and K, Gentsch J. Enhancement of detection  
370 and quantification of rotavirus in stool using a modified real-time RT-PCR assay. *J*  
371 *Med Virol*. 2008;*80*:1489-1496.
- 372 17. Hoehne M, Schreier E. Detection of Norovirus genogroup I and II by multiplex real-  
373 time RT-PCR using a 3'-minor groove binder-DNA probe. *BMC Infect Dis*.  
374 2006;*6*(1):1-6.
- 375 18. Kageyama T, Kojima S, Shinohara M, Uchida K, Fukushi S, Hoshino FB, Takeda N,  
376 Katayama K. Broadly reactive and highly sensitive assay for Norwalk-like viruses  
377 based on real-time quantitative reverse transcription-PCR. *J Clin Microbiol*. 2003;  
378 41:1548-57.
- 379 19. Oka T, Katayama K, Hansman GS, Kageyama T, Ogawa S, Wu FT, White PA,  
380 Takeda N. Detection of human sapovirus by real-time reverse transcription-  
381 polymerase chain reaction. *J Med Virol*. 2006;*78*:1347-1353.
- 382 20. Heim A, Ebnet C, Harste G, Pring-Akerblom P. Rapid and quantitative detection of  
383 human adenovirus DNA by real-time PCR. *J Med Virol*. 2003;*70*:228-239.
- 384 21. Logan C, O'Leary JJ, O'Sullivan N. Real-time reverse transcription-PCR for detection  
385 of rotavirus and adenovirus as causative agents of acute viral gastroenteritis in  
386 children. *J Clin Microbiol*. 2006;*44*:3189-3195.

- 387 22. Jothikumar N, Cromeans TL, Robertson BH, Meng XJ, Hill VR. A broadly reactive  
388 one-step real-time RT-PCR assay for rapid and sensitive detection of hepatitis E virus.  
389 J Virol Methods. 2006;131:65-71.
- 390 23. Pietsch C, Liebert UG. "Genetic diversity of human parechoviruses in stool samples,  
391 Germany." Infect Genet Evol. 2019;68:280-285.
- 392 24. Escutenaire S, Mohamed N, Isaksson M, Thoren P, Klingeborn B, Belák S, Berg M,  
393 Blomberg J. SYBR Green real-time reverse transcription-polymerase chain reaction  
394 assay for the generic detection of coronaviruses. Arch Virol. 2007;152(1):41-58.
- 395 25. Pietsch C, Schuster V, Liebert UG. A hospital based study on inter-and intragenotypic  
396 diversity of human rotavirus A VP4 and VP7 gene segments, Germany. J Clin Virol.  
397 2011;50(2):136-141.
- 398 26. Marques AM, Diedrich S, Huth C, Schreier E. Group A rotavirus genotypes in  
399 Germany during 2005/2006. Arch Virol. 2007;152(9):1743-1749.
- 400 27. PSPP statistical software. Downloaded from  
401 <https://www.gnu.org/software/pspp/get.html>
- 402 28. Agócs MM, Serhan F, Yen C, Mwenda JM, de Oliveira LH, Teleb N, Wasley A,  
403 Wijesinghe PR, Fox K, Tate JE, Gentsch JR. WHO global rotavirus surveillance  
404 network: a strategic review of the first 5 years, 2008–2012. MMWR Morb Mortal  
405 Wkly Rep. 2014;63(29):634.
- 406 29. Williams AR, Bain RES, Fisher MB, Cronk R, Kelly ER, Bartram J. A Systematic  
407 Review and Meta-Analysis of Fecal Contamination and Inadequate Treatment of  
408 Packaged Water. Li M, ed. PLoS One. 2015; 10(10): e0140899.
- 409 30. Adah MI, Wade A, Taniguchi K. Molecular epidemiology of Rotaviruses in Nigeria:  
410 detection of unusual strains with G2P [6] and G8P [1] specificities. J Clin Microbiol.  
411 2001;39(11):3969-3975.

- 412 31. Tagbo BN, Mwenda JM, Armah G, Obidike EO, Okafor UH, Oguonu T, Ozumba  
413 UC, Eke CB, Chukwubuike C, Edelu BO, Ezeonwu BU. Epidemiology of rotavirus  
414 diarrhea among children younger than 5 years in Enugu, South East, Nigeria. *Pediatr*  
415 *Infect Dis J.* 2014;33:S19-22.
- 416 32. Tagbo BN, Mwenda JM, Eke CB, Edelu BO, Chukwubuike C, Armah G, Seheri ML,  
417 Isiaka A, Namadi L, Okafor HU, Ozumba UC. Rotavirus diarrhoea hospitalizations  
418 among children under 5 years of age in Nigeria, 2011–2016. *Vaccine.*  
419 2018;36(51):7759-7764.
- 420 33. Japhet MO, Famurewa O, Iturriza-Gomara M, Adesina OA, Opaleye OO, Niendorf S,  
421 Bock CT, Mas Marques A. Group A rotaviruses circulating prior to a national  
422 immunization programme in Nigeria: Clinical manifestations, high G12P [8]  
423 frequency, intra-genotypic divergence of VP4 and VP7. *J of Med Virol.*  
424 2018;90(2):239-249.
- 425 34. Clemens J, Rao M, Ahmed F, Ward R, Huda S, Chakraborty J, Yunus M, Khan MR,  
426 Ali M, Kay B. et al. Breast-feeding and the risk of life-threatening *Rotavirus*diarrhea:  
427 prevention or postponement? *Pediatr.* 1993;92(5):680–685
- 428 35. Golding J, Emmett PM, Rogers IS. Gastroenteritis, diarrhoea and breast feeding.  
429 *Early Hum Dev.* 1997; 49 (Suppl): S83–103. doi: 10.1016/S0378-3782(97)00055-8.
- 430 36. Aminu M, Ahmad AA, Umoh JU, De Beer MC, Esona MD, Steele AD. Adenovirus  
431 infection in children with diarrhea disease in North western Nigeria. *Ann Afr Med.*  
432 2007;6(4):168-173.
- 433 37. Ayolabi C, Ojo D, Akpan I. Astrovirus Infection in Children in Lagos, Nigeria. *Afr J*  
434 *Infect Dis.* 2012;6(1):1-4
- 435 38. Munjita SM, Current Status of Norovirus Infections in Children in Sub-Saharan  
436 Africa. *J Trop Med.* 2015;1-7 doi:10.1155/2015/309648

- 437 39. Shioda K, Cosmas L, Audi A, Gregoricus N, Vinjé J, Parashar UD, Hall AJ.  
438 Population-Based Incidence Rates of Diarrheal Disease Associated with Norovirus,  
439 Sapovirus, and Astrovirus in Kenya. PLoS One. 2016;11(4):e0145943.  
440 <http://doi.org/10.1371/journal.pone.0145943>
- 441 40. Wildenbeest JG, Benschop KS, Minnaar RP, Jongh SB, Wolthers KC, Pajkrt D.  
442 Clinical relevance of positive human parechovirus type 1 and 3 PCR in stool samples.  
443 Clin Microbiol Infect. 2014;20(10):O640-0647.
- 444 41. Schmittgen TD, Livak KJ. Analyzing real-time PCR data by the comparative CT  
445 method. Nat Protoc. 2008;3(6):1101-1108.
- 446 42. Ianiro G, Delogu R, Baba M, Oderinde BS, Dawurung J, Ruggeri FM, Fiore L.  
447 Molecular characterization of group A rotavirus strains detected in children with  
448 diarrhea admitted to Nigerian hospitals in 2013. Arch Virol. 2015;160(6):1511-1517.
- 449 43. Motayo BO, Faneye AO, Adeniji JA. Epidemiology of rotavirus A in Nigeria:  
450 Molecular diversity and current Insights. J Pathog. 2018;2018:1-7
- 451 44. Japhet MO, Famurewa O, Iturriza-Gomara M, Adesina OA, Opaleye OO, Niendorf S,  
452 Bock CT, Mas Marques A. Group A rotaviruses circulating prior to a national  
453 immunization programme in Nigeria: Clinical manifestations, high G12P [8]  
454 frequency, intra-genotypic divergence of VP4 and VP7. J Med Virol. 2018;90(2):239-  
455 49.
- 456 45. Jagai JS, Sarkar R, Castronovo D, Kattula D, McEntee J, Ward H, Kang G, Naumova  
457 EN. Seasonality of rotavirus in South Asia: a meta-analysis approach assessing  
458 associations with temperature, precipitation, and vegetation index. PloS One. 2012  
459 May 31;7(5):e38168.
- 460 46. Tagbo BN, Chukwubike C, Mwenda JM, Seheri ML, Armah G, Mphahlele JM,  
461 Ozumba UC, Benjamin-Puja C, Azubuike C, Okafor HU, Nnani RO. Molecular

462            characterization of rotavirus strains circulating in Enugu Nigeria: 2011 to 2016.

463            World J Vaccines. 2019;9(01):22.

464

465





467

468

469

470

471

472

473

474

475

476

477

478

479

480

481

482

483

484
